# Supplementary material for: Formulation of plant-based meat alternatives and its optimization by experimental design using response surface methodology
Source: Royal Society of Chemistry journal article supplement (doi:10.1039/d3fb00210a), 2024-01-01
Supplement: d3fb00210a1.pdf [file d3fb00210a1.pdf]

1 **Formulation of Plant-Based Meat Alternatives and its Optimization**  
2 **by Experimental Design using Response Surface Methodology**

3

4

5 **T. Archana Devi, R. Rahul, H. Melvin Joshua, N. Naveen, and**

6 **Pothiyappan Karthik\***

7 Centre for Food Nanotechnology, Department of Food Technology,

8 Karpagam Academy of Higher Education (Deemed to be University),

9 Coimbatore - 641 021, Tamil Nadu, India.

10

11 **Supplementary information**

12 **Descriptive details**

13 Moisture

14 Sensory evaluation

15

16 **Tables**

17 Table S1. ANOVA table for the response: Protein, Energy and Carbohydrates

18 Table S2. Proximate analysis for the final product

19 Table S3. Sensory analysis for the final product

20

21 **Figures**

22 Figure S1. Identification of the highest and lowest interaction between the factors to  
23 determine the protein.

24 Figure S2. Identification of the highest and lowest interaction between the factors to  
25 determine the energy.

26 Figure S3. Identification of the highest and lowest interaction between the factors to  
27 determine the carbohydrate.

28

### 29 **Moisture Analysis**

30 The moisture content of the samples was determined using the Sartorius MA35  
31 model, a moisture analyzer, in accordance with the procedure outlined in AOAC  
32 (Association of Official Analytical Chemists, 2005)<sup>1</sup>. Each sample weighing 2 grams  
33 was carefully placed in the moisture analyzer. The analysis was conducted for a  
34 duration of 1 hour to ensure accurate measurement of the moisture content.  
35 Subsequently, an additional 10 minutes run was performed to verify the consistency  
36 of the weight difference among the samples, with the aim of keeping the variance  
37 within an acceptable range of less than 1 mg. This additional step was implemented  
38 to ensure the reliability and consistency of the moisture content measurement. The  
39 methodology prescribed in AOAC (2005) provides standardized guidelines for  
40 moisture analysis in various food and agricultural products.

41

### 42 **Sensory evaluation**

43 The quality of the vegan meat alternative study was assessed through sensory  
44 evaluation. The evaluation focused on several sensory parameters, including taste,  
45 texture, odor, appearance, and overall acceptability. A panel of 10 trained evaluators  
46 (6 male and 4 females, aged between 19 and 30, non-smokers) participated in the  
47 assessment. The sensory evaluation was conducted using a 9-point hedonic scale,  
48 where the evaluators rated each attribute on a scale ranging from 1 (dislike  
49 extremely) to 9 (like extremely). This scale allowed for subjective evaluation of the  
50 sensory attributes, providing insights into the evaluators' preferences and

51 perceptions of the vegan meat alternative. To determine the overall acceptability of  
52 the product, the average scores from all the sensory attributes were considered. This  
53 involved combining the individual scores for taste, texture, odor, appearance, and  
54 overall acceptability to calculate an overall score that reflected the evaluators' overall  
55 perception and acceptance of the product. By utilizing sensory evaluation and  
56 hedonic scales, valuable information regarding the sensory characteristics and  
57 consumer acceptance of the vegan meat alternative was obtained. Considering  
58 multiple sensory attributes and overall acceptability allows researchers to assess the  
59 overall quality and potential market acceptance of the product<sup>2</sup>.

60

## 61 References

- 62 1. AOAC (2005). Official Methods of Analysis. 18th Edition, Association of  
63 Official Analytical Chemists. Washington D.C., USA.
- 64 2. Piggott, J. R., Simpson, S. J., & Williams, S. A. (1998). Sensory  
65 analysis. *International journal of food science & technology*, **33**(1), 7-12.

66

67

68 **Table S1.** ANOVA table for the response: Protein, Energy and Carbohydrates

| Source           | DF | Protein | Energy  | Carbohydrates |
|------------------|----|---------|---------|---------------|
|                  |    | P-Value | P-Value | P-Value       |
| Model            | 9  | 0.000   | 0.000   | 0.000         |
| Linear           | 3  | 0.000   | 0.000   | 0.000         |
| Horse gram (gm)  | 1  | 0.000   | 0.000   | 0.000         |
| Soy flour (gm)   | 1  | 0.000   | 0.000   | 0.000         |
| Wheat flour (gm) | 1  | 0.000   | 0.000   | 0.000         |

*Formulation of Plant-Based Meat Alternatives*

---

|                       |        |       |       |       |
|-----------------------|--------|-------|-------|-------|
| Square                | 3      | 0.000 | 0.000 | 0.000 |
| Horse                 | gram   |       |       |       |
| (gm)*Horse            | gram 1 | 0.000 | 0.000 | 0.000 |
| (gm)                  |        |       |       |       |
| Soy flour (gm)*Soy    | 1      | 0.000 | 0.000 | 0.000 |
| flour (gm)            |        |       |       |       |
| Wheat flour           | 1      | 0.000 | 0.000 | 0.000 |
| (gm)*Wheat flour (gm) |        |       |       |       |
| 2-Way Interaction     | 3      | 0.000 | 0.000 | 0.000 |
| Horse gram (gm)*Soy   | 1      | 0.000 | 0.000 | 0.000 |
| flour (gm)            |        |       |       |       |
| Horse gram            | 1      | 0.000 | 0.000 | 0.000 |
| (gm)*Wheat flour (gm) |        |       |       |       |
| Soy flour (gm)*Wheat  | 1      | 0.000 | 0.000 | 0.000 |
| flour (gm)            |        |       |       |       |
| Error                 | 10     |       |       |       |
| Lack-of-Fit           | 5      | -     | -     | -     |
| Pure Error            | 5      |       |       |       |
| Total                 | 19     |       |       |       |

---

69

70

71

72

73

74

75 **Table S2.** Proximate analysis for the final product

| <b>S.No.</b> | <b>Parameter</b> | <b>Result (%)</b> |
|--------------|------------------|-------------------|
|              |                  | Kcal/100g         |
| 1            | Ash              | 3.91              |
| 2            | Protein          | 20.22             |
| 3            | Fat              | 0.24              |
| 4            | Fiber            | 0.32              |
| 5            | Carbohydrate     | 70.52             |
| 6            | Energy           | 365.12            |

76

77

78

79

80

81

82

83

84

85

86

87

88

89

90

91

92 **Table S3.** Sensory analysis for the final product

| <b>Taste</b> | <b>Texture</b> | <b>Odour</b> | <b>Appearance</b> | <b>Overall Acceptability</b> |
|--------------|----------------|--------------|-------------------|------------------------------|
| 6            | 7              | 7            | 8                 | 7                            |
| 6            | 8              | 7            | 8                 | 7.25                         |
| 6            | 7              | 7            | 5                 | 6.25                         |
| 5            | 7              | 8            | 7                 | 6.75                         |
| 6            | 8              | 6            | 9                 | 7.25                         |
| 6            | 9              | 7            | 5                 | 6.75                         |
| 6            | 7              | 7            | 6                 | 6.5                          |
| 6            | 7              | 7            | 8                 | 7                            |
| 6            | 6              | 7            | 3                 | 5.5                          |
| 6            | 7              | 7            | 9                 | 7.25                         |

93

94

95

96

97

98

99

100

101

102

103

104

105

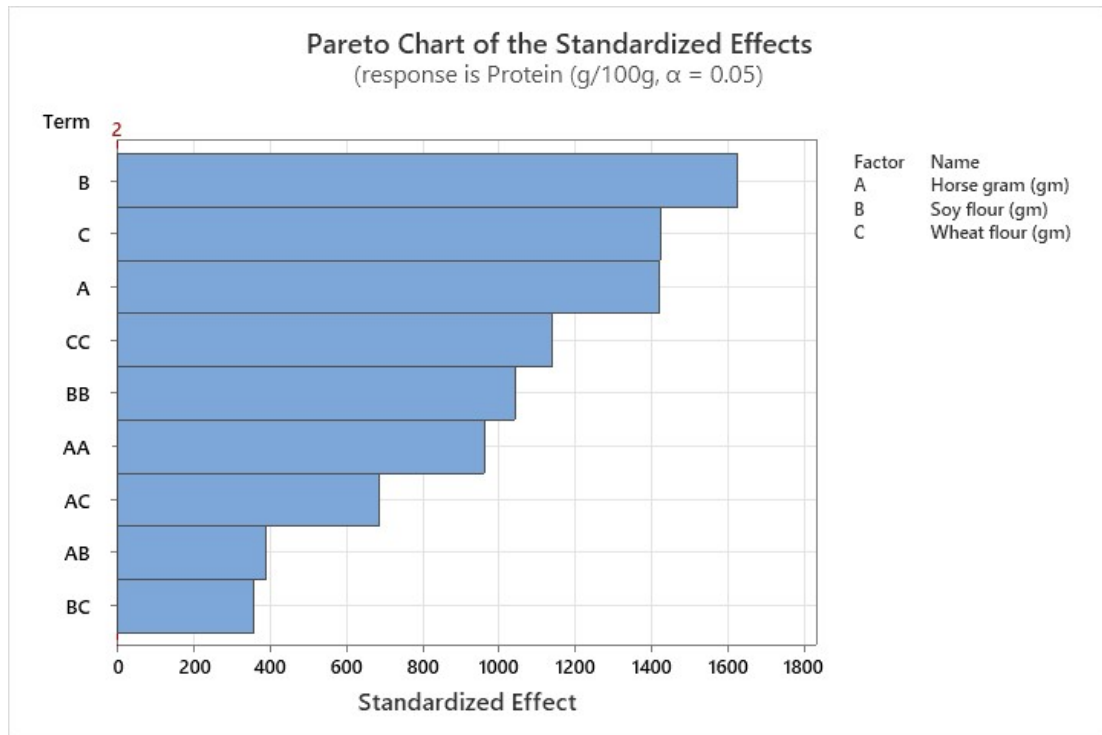

106

107 **Figure S1.** Identification of the highest and lowest interaction between the factors to  
108 determine the protein.

109

110

111

112

113

114

115

116

117

118

119

120

121

122

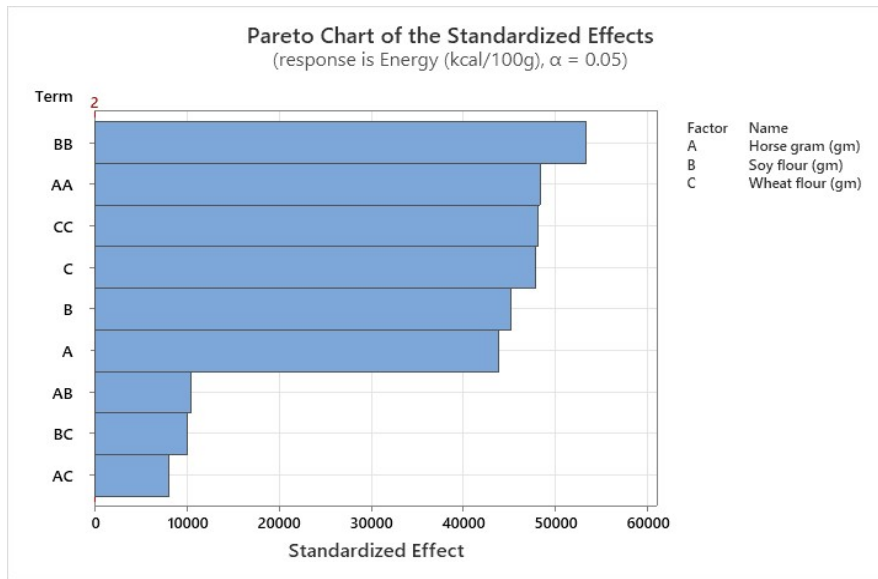

123

124 **Figure S2.** Identification of the highest and lowest interaction between the factors to  
125 determine the energy.

126

127

128

129

130

131

132

133

134

135

136

137

138

139

140



141

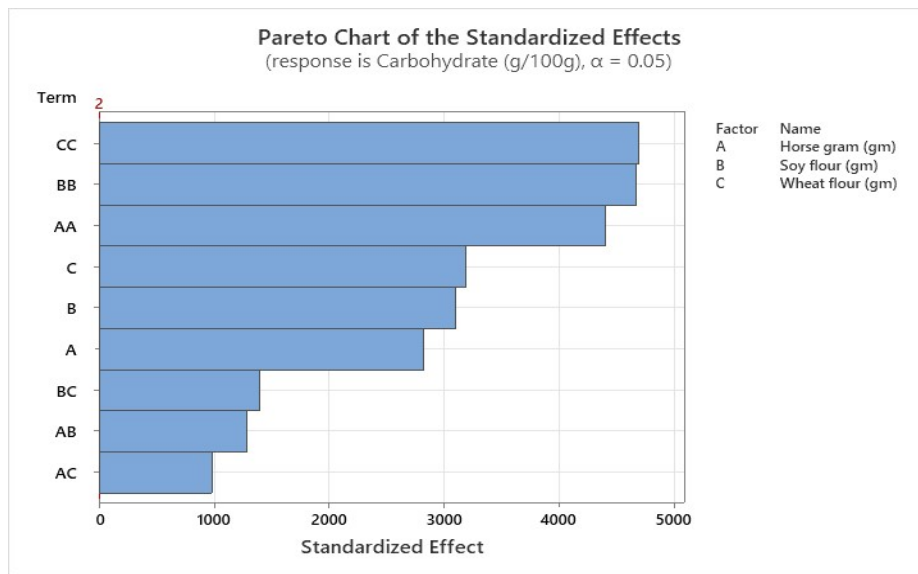

142

143 **Figure S3.** Identification of the highest and lowest interaction between the factors to  
144 determine the carbohydrate.

145

146

147

148

149

150

151

152

153

154

155

156

157

158

159
